# Supplementary material for: Evaluating generative AI integration in Saudi Arabian education: a mixed-methods study
Source: PeerJ Comput Sci. 2024 Feb 16;10:e1879. doi: 10.7717/peerj-cs.1879 (PMC10909195; doi:10.7717/peerj-cs.1879)
Supplement: Supplemental Information 1 [file peerj-cs-10-1879-s001.xlsx]

## Sheet: Sheet1
Increases academic achievement (e.g., grades).	Results in students neglecting important traditional learning resources (e.g., library books).	Is effective because I believe I can implement it successfully.	Promotes student collaboration.	Promotes the development of communication skills (e.g., writing skills, presentation skills).	Is a valuable instructional tool.	Makes teachers feel more competent as educators.	Is an effective tool for students of all abilities.	Enhances my professional development.	Eases the pressure on me as a teacher.	Motivates students to get more involved in learning activities.	Should reduce the number of teachers employed in the future.	Will increase the amount of stress and anxiety students experience.	Requires extra time to plan learning activities.	Improves student learning of critical concepts and ideas.
2	4	5	5	3	1	2	5	2	4	5	5	3	1	2
4	4	5	4	4	4	4	5	2	4	5	4	4	4	4
5	4	5	2	5	5	5	5	2	4	5	2	5	5	5
4	4	4	4	4	5	4	5	2	4	4	4	4	5	4
5	4	4	4	4	4	5	4	2	4	4	4	4	4	5
5	3	4	4	4	5	5	5	2	3	4	4	4	5	5
5	5	5	5	4	1	5	5	1	5	5	5	4	1	5
4	4	4	4	4	3	4	5	1	4	4	4	4	3	4
5	5	5	4	5	5	5	5	1	5	5	4	5	5	5
4	4	5	5	4	4	4	4	2	4	5	5	4	4	4
4	4	4	4	4	4	4	4	1	4	4	4	4	4	4
5	3	4	2	4	4	5	4	1	3	4	2	4	4	5
4	3	3	4	2	4	4	4	2	3	3	4	2	4	4
5	5	5	5	3	4	5	5	2	5	5	5	3	4	5
5	3	5	5	4	4	5	4	2	3	5	5	4	4	5
3	3	3	3	3	2	3	4	2	3	3	3	3	2	3
3	4	5	4	3	5	3	2	1	4	5	4	3	5	3
4	4	5	4	4	5	4	4	1	4	5	4	4	5	4
4	4	5	5	5	4	4	4	2	4	5	5	5	4	4
4	5	4	4	5	4	4	5	2	5	4	4	5	4	4
1	2	3	3	1	1	1	3	1	2	3	3	1	1	1
5	5	5	5	5	5	5	5	2	5	5	5	5	5	5
5	4	5	5	4	4	5	5	1	4	5	5	4	4	5
2	4	4	3	5	4	2	4	2	4	4	3	5	4	2
4	5	5	5	4	5	4	5	2	5	5	5	4	5	4
5	5	5	5	5	5	5	5	2	5	5	5	5	5	5
3	5	5	4	5	4	3	4	1	5	5	4	5	4	3
4	4	5	4	4	5	4	4	2	4	5	4	4	5	4
1	1	3	1	1	1	1	1	1	1	3	1	1	1	1
4	5	4	4	3	4	4	3	1	5	4	4	3	4	4
4	5	4	5	4	3	4	5	2	5	4	5	4	3	4
4	5	5	4	4	5	4	5	2	5	5	4	4	5	4
5	4	5	4	4	5	5	5	2	4	5	4	4	5	5
4	5	5	3	5	4	4	5	1	5	5	3	5	4	4
4	3	3	3	3	4	4	3	1	3	3	3	3	4	4
3	3	3	3	4	3	3	4	1	3	3	3	4	3	3
4	5	5	4	5	4	4	5	2	5	5	4	5	4	4
5	5	4	5	5	4	5	4	2	5	4	5	5	4	5
3	4	2	3	4	5	3	3	1	4	2	3	4	5	3
2	3	4	4	3	2	2	4	2	3	4	4	3	2	2
4	5	5	4	4	5	4	5	1	5	5	4	4	5	4
5	4	5	5	5	5	5	5	1	4	5	5	5	5	5
1	3	3	2	1	1	1	1	1	3	3	2	1	1	1
5	5	4	4	5	5	5	5	2	5	4	4	5	5	5
2	3	4	3	3	3	2	3	1	3	4	3	3	3	2
4	5	4	1	4	4	4	5	2	5	4	1	4	4	4
5	4	4	5	5	4	5	5	1	4	4	5	5	4	5
5	5	5	4	5	5	5	4	1	5	5	4	5	5	5
5	4	4	5	5	5	5	5	1	4	4	5	5	5	5
5	5	5	5	5	3	5	4	2	5	5	5	5	3	5
5	5	5	5	5	4	5	5	1	5	5	5	5	4	5
5	4	5	5	5	4	5	4	1	4	5	5	5	4	5
4	3	5	5	4	3	4	3	1	3	5	5	4	3	4
1	3	5	2	5	1	1	5	1	3	5	2	5	1	1
5	5	5	5	5	5	5	5	2	5	5	5	5	5	5
5	4	4	5	5	4	5	4	2	4	4	5	5	4	5
1	3	4	4	4	1	1	5	1	3	4	4	4	1	1
1	5	5	4	5	1	1	1	2	5	5	4	5	1	1
5	5	5	5	5	4	5	4	1	5	5	5	5	4	5
5	5	5	5	3	4	5	5	1	5	5	5	3	4	5
4	4	4	5	4	5	4	4	1	4	4	5	4	5	4
2	4	3	4	5	5	2	1	2	4	3	4	5	5	2
3	1	3	4	3	4	3	3	2	1	3	4	3	4	3
4	5	4	4	4	5	4	5	2	5	4	4	4	5	4
5	4	5	5	5	5	5	5	2	4	5	5	5	5	5
4	5	3	5	3	4	4	5	2	5	3	5	3	4	4
4	5	4	4	5	4	4	5	2	5	4	4	5	4	4
2	4	5	4	5	1	2	5	2	4	5	4	5	1	2
5	5	4	5	5	5	5	5	2	5	4	5	5	5	5
5	1	5	4	5	5	5	5	1	1	5	4	5	5	5
4	1	4	5	5	4	4	5	1	1	4	5	5	4	4
5	4	4	4	4	5	5	5	2	4	4	4	4	5	5
2	4	4	4	5	4	2	4	2	4	4	4	5	4	2
5	2	3	4	2	2	5	2	1	2	3	4	2	2	5
4	4	4	5	4	4	4	5	2	4	4	5	4	4	4
4	4	5	4	4	4	4	4	2	4	5	4	4	4	4
4	4	4	4	5	4	4	5	2	4	4	4	5	4	4
4	5	4	5	5	5	4	5	2	5	4	5	5	5	4
4	4	5	2	4	3	4	2	2	4	5	2	4	3	4
4	4	5	5	4	5	4	5	1	4	5	5	4	5	4
4	5	5	4	4	4	4	5	2	5	5	4	4	4	4
4	4	4	5	5	4	4	4	2	4	4	5	5	4	4
4	5	4	5	5	4	4	5	2	5	4	5	5	4	4
1	3	4	5	4	1	1	5	1	3	4	5	4	1	1
5	5	5	5	5	5	5	5	2	5	5	5	5	5	5
4	5	5	4	4	4	4	5	1	5	5	4	4	4	4
2	4	4	4	3	3	2	4	2	4	4	4	3	3	2
4	4	4	4	4	4	4	4	1	4	4	4	4	4	4
4	4	5	4	4	5	4	5	2	4	5	4	4	5	4
4	5	5	5	5	4	4	4	2	5	5	5	5	4	4
5	4	3	4	5	5	5	5	2	4	3	4	5	5	5
1	4	3	3	1	1	1	5	2	4	3	3	1	1	1
5	5	4	5	4	5	5	4	2	5	4	5	4	5	5
3	4	4	4	4	3	3	4	2	4	4	4	4	3	3
3	5	5	5	3	4	3	4	2	5	5	5	3	4	3
5	4	5	5	5	5	5	3	2	4	5	5	5	5	5
4	4	3	4	4	2	4	5	2	4	3	4	4	2	4
3	5	4	3	5	4	3	5	1	5	4	3	5	4	3
4	4	5	2	4	3	4	2	2	4	5	2	4	3	4
4	4	5	5	4	5	4	5	1	4	5	5	4	5	4
4	5	5	4	4	4	4	5	2	5	5	4	4	4	4
4	4	4	5	5	4	4	4	2	4	4	5	5	4	4
4	5	4	5	5	4	4	5	2	5	4	5	5	4	4
1	3	4	5	4	1	1	5	1	3	4	5	4	1	1
5	5	5	5	5	5	5	5	2	5	5	5	5	5	5
4	5	5	4	4	4	4	5	1	5	5	4	4	4	4
2	4	4	4	3	3	2	4	2	4	4	4	3	3	2
4	4	4	4	4	4	4	4	1	4	4	4	4	4	4
4	4	5	4	4	5	4	5	2	4	5	4	4	5	4
4	5	5	5	5	4	4	4	2	5	5	5	5	4	4
5	4	3	4	5	5	5	5	2	4	3	4	5	5	5
1	4	3	3	1	1	1	5	2	4	3	3	1	1	1
5	5	4	5	4	5	5	4	2	5	4	5	4	5	5
3	4	4	4	4	3	3	4	2	4	4	4	4	3	3
3	5	5	5	3	4	3	4	2	5	5	5	3	4	3
5	4	5	5	5	5	5	3	2	4	5	5	5	5	5
4	4	3	4	4	2	4	5	2	4	3	4	4	2	4
3	5	4	3	5	4	3	5	1	5	4	3	5	4	3
4	4	5	2	4	3	4	2	2	4	5	2	4	3	4
4	4	5	5	4	5	4	5	1	4	5	5	4	5	4
4	5	5	4	4	4	4	5	2	5	5	4	4	4	4
4	4	4	5	5	4	4	4	2	4	4	5	5	4	4
4	5	4	5	5	4	4	5	2	5	4	5	5	4	4
1	3	4	5	4	1	1	5	1	3	4	5	4	1	1
5	5	5	5	5	5	5	5	2	5	5	5	5	5	5
